# Supplementary material for: Effects of Nitrate Assimilation in Leaves and Roots on Biomass Allocation and Drought Stress Responses in Poplar Seedlings
Source: MDPI journal article supplement (doi:10.3390/f15050779), 2024-04-29
Supplement: s1 [file s1]

**Table S1** Plant height and base diameter changes after 106 days of water and/or nitrogen availability treatments for Biyu and Xiaoye seedlings, and results from analyses of variance.

|                    | Biyu       |           |            |            | Xiaoye      |           |            |            | Results from analyses of variance |     |     |     |     |     |       |
|--------------------|------------|-----------|------------|------------|-------------|-----------|------------|------------|-----------------------------------|-----|-----|-----|-----|-----|-------|
|                    | CK         | D         | NA         | D + NA     | CK          | D         | NA         | D + NA     | C                                 | W   | N   | C:W | C:N | W:N | C:W:N |
| Plant height (cm)  | 140±7 b    | 107±7 c   | 195±6 a    | 150±6 b    | 146±5 b     | 110±3 c   | 197±5 a    | 151±3 b    | *                                 | *** | *** | ns  | ns  | *   | ns    |
| Base diameter (mm) | 10.7±0.4 c | 8.2±0.3 d | 13.2±0.4 a | 11.1±0.4 b | 10.2±0.3 bc | 9.6±0.2 d | 13.0±0.4 a | 10.7±0.4 b | **                                | *** | *** | ns  | ns  | *   | ns    |

Note: Values shown are means ± SD. Different letters indicate statistical differences among treatments (Tukey HSD,  $P < 0.05$ ). The significance levels of three factors and their interactions were labeled with ns  $0.05 < P$ , \*  $0.01 < P < 0.05$ , \*\*  $0.001 < P < 0.01$  and \*\*\*  $P < 0.001$ ).

Abbreviations for treatments: CK, control; D, drought; NA, nitrogen addition; D + NA, drought and nitrogen addition;

Abbreviations for factors and their interactions: C, poplar clone; W, water; N, nitrogen; C:W, interaction between clone and water; C:N, interaction between clone and nitrogen; W:N, interaction between water and nitrogen; C:W:N, interactions among clone, water and nitrogen.

**Table S2** The significance levels of clone, water, nitrogen, and their interactions in biomass distribution of Biyu and Xiaoye seedlings.

|                                  | Biyu          |               |               |               | Xiaoye        |                |              |               | Results from analyses of variance |     |     |     |     |     |       |
|----------------------------------|---------------|---------------|---------------|---------------|---------------|----------------|--------------|---------------|-----------------------------------|-----|-----|-----|-----|-----|-------|
|                                  | CK            | D             | NA            | D + NA        | CK            | D              | NA           | D + NA        | C                                 | W   | N   | C:W | C:N | W:N | C:W:N |
| Total biomass (g)                | 104 ± 5 c     | 72 ± 4 d      | 171 ± 7 a     | 110 ± 6 c     | 112 ± 10 c    | 82 ± 9 d       | 138 ± 8 b    | 111 ± 3 c     | ns                                | *** | *** | **  | *** | **  | **    |
| Biomss of leaf (g)               | 27.0 ± 0.5 cd | 16.5 ± 1.1 e  | 42.2 ± 1.9 a  | 28.7 ± 1.9 c  | 20.0 ± 2.7 e  | 17.8 ± 0.8 e   | 35.0 ± 1.6 b | 24.5 ± 0.2 d  | ***                               | *** | *** | *** | *   | *** | *     |
| Biomss of stem (g)               | 43.4 ± 2.3 b  | 29.1 ± 1.2 c  | 67.4 ± 1.7 a  | 45.9 ± 3.4 b  | 49.8 ± 6.5 b  | 30.4 ± 6.0 c   | 65.6 ± 8.5 a | 49.9 ± 3.8 b  | *                                 | *** | *** | ns  | ns  | ns  | ns    |
| Biomss of coarse root (g)        | 9.5 ± 1.7 c   | 6.1 ± 0.5 d   | 15.3 ± 1.2 b  | 10.1 ± 1.4 c  | 18.8 ± 1.4 a  | 13.9 ± 1.5 b   | 15.2 ± 1.0 b | 17.3 ± 1.3 ab | ***                               | *** | *** | **  | *** | ns  | ***   |
| Biomss of fine root (g)          | 24.5 ± 1.3 b  | 20.4 ± 3.0 b  | 45.8 ± 5.0 a  | 25.6 ± 2.4 b  | 23.7 ± 2.4 b  | 20.0 ± 1.8 b   | 21.9 ± 2.3 b | 19.0 ± 1.1 b  | ***                               | *** | *** | *** | *** | *** | ***   |
| Leaf biomass fraction (%)        | 25.9 ± 0.9 b  | 22.9 ± 0.6 c  | 24.7 ± 0.9 c  | 26.1 ± 0.6 a  | 17.8 ± 2.5 d  | 21.9 ± 2.9 d   | 25.5 ± 2.5 c | 22.1 ± 0.7 c  | ***                               | ns  | *** | ns  | *   | ns  | ***   |
| Stem biomass fraction (%)        | 41.6 ± 0.9 bc | 40.4 ± 1.6 bc | 39.5 ± 0.8 bc | 41.6 ± 2.5 bc | 44.3 ± 2.2 ab | 36.8 ± 3.5 c   | 47.6 ± 3.7 a | 45.0 ± 2.3 ab | **                                | *   | *   | **  | **  | *   | ns    |
| Coarse root biomass fraction (%) | 9.0 ± 1.2 bc  | 8.6 ± 1.2 c   | 9.0 ± 1.0 bc  | 9.1 ± 0.9 bc  | 16.7 ± 0.7 a  | 17.0 ± 0.1 a   | 11.1 ± 0.7 b | 15.6 ± 1.0 a  | ***                               | *   | **  | **  | *** | **  | *     |
| Fine root biomass fraction (%)   | 23.5 ± 0.6 bc | 28.2 ± 2.7 a  | 26.8 ± 1.8 ab | 23.2 ± 2.1 bc | 21.2 ± 1.4 cd | 24.4 ± 0.8 abc | 15.9 ± 1.4 e | 17.2 ± 1.4 de | ***                               | ns  | *** | ns  | **  | *** | *     |

Note: The significance levels of three factors and their interactions were labeled with ns  $0.05 < P$ , \*  $0.01 < P < 0.05$ , \*\*  $0.001 < P < 0.01$  and \*\*\*  $P < 0.001$ ).

Abbreviations for treatments: CK, control; D, drought; NA, nitrogen addition; D + NA, drought and nitrogen addition;

Abbreviations for factors and their interactions: C, poplar clone; W, water; N, nitrogen; C:W, interaction between clone and water; C:N, interaction between clone and nitrogen; W:N, interaction between water and nitrogen; C:W:N, interactions among clone, water and nitrogen.

Figure S1.

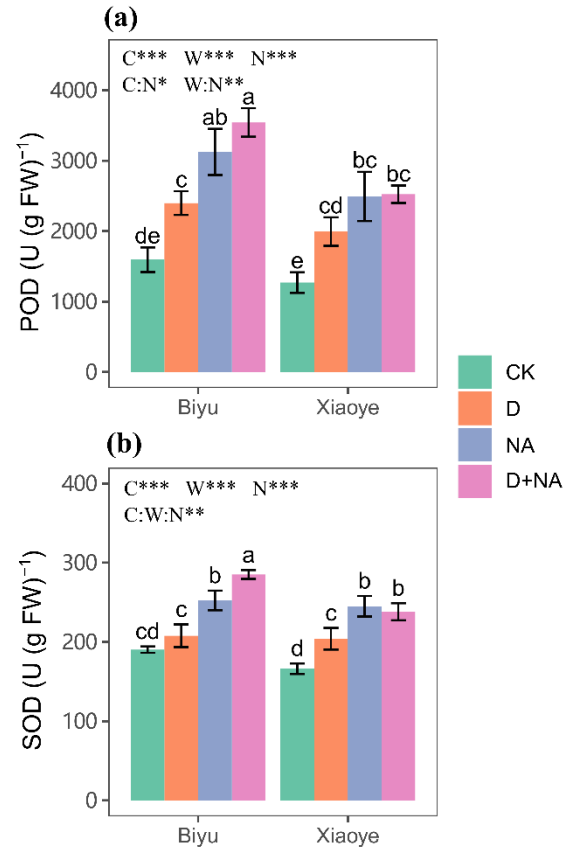

**Figure S1.** Peroxidase (POD) and superoxide dismutase (SOD) activities changes in leaves of Biyu and Xiaoye. Values shown are means  $\pm$  SD. Different letters indicate statistical differences among treatments ( $P < 0.05$ ). The significance levels of factors and their interactions are indicated by \*  $0.01 < P < 0.05$ , \*\*  $0.001 < P < 0.01$  and \*\*\*  $P < 0.001$ . Treatments: CK, control; D, drought; NA, nitrogen addition; D + NA, drought and nitrogen addition. Factors and their interactions: C, poplar clone; W, water; N, nitrogen; C:W, interaction between clone and water; C:N, interaction between clone and nitrogen; W:N, interaction between water and nitrogen; C:W:N, interactions among clone, water and nitrogen.
