# Supplementary material for: Effects of Nitrate Assimilation in Leaves and Roots on Biomass Allocation and Drought Stress Responses in Poplar Seedlings
Source: MDPI journal article supplement (doi:10.3390/f15050779), 2024-04-29
Supplement: s1 [file s1]

Archive with 1 entries (1 files):
- forests-2970624-supplementary.pdf
